# Supplementary material
Source: PubMed Central journal article supplement (PMC3242319)
Supplement: npp2011239x5.pdf [file npp2011239x5.pdf]

| Probe ID     | Symbol        | Accession number | d.log2exp | fold-change | Stress | Ctrl  | P.perm | FDR.Group | Function                                |
|--------------|---------------|------------------|-----------|-------------|--------|-------|--------|-----------|-----------------------------------------|
| ILMN_1249000 | ECRG          | NM_024283        | -0.774    | 0.585       | 2.289  | 3.062 | 0.000  | 0.000     | Cell cycle regulation, senescence       |
| ILMN_2634222 | EFS           | NM_010112        | -1.015    | 0.495       | 2.314  | 3.330 | 0.000  | 0.000     | Immune response                         |
| ILMN_2443330 | TTR           | NM_013697        | -0.965    | 0.512       | 3.778  | 4.743 | 0.000  | 0.000     | Thyroxine carrier, neuroprotection      |
| ILMN_2772998 | ENPP2         | NM_015744        | -0.687    | 0.621       | 2.883  | 3.571 | 0.000  | 0.000     | Neural stem cell proliferation/survival |
| ILMN_2642800 | SOSTDC1       | NM_025312        | -0.665    | 0.631       | 2.306  | 2.971 | 0.000  | 0.001     | Neural stem cell proliferation/survival |
| ILMN_2667635 | CLIC6         | NM_172469        | -0.582    | 0.668       | 2.291  | 2.873 | 0.000  | 0.002     | Water homeostatis                       |
| ILMN_2756486 | AQP1          | NM_007472        | -0.566    | 0.676       | 2.242  | 2.808 | 0.000  | 0.003     | Water homeostatis                       |
| ILMN_1244096 | 9630050M13RIK | NM_001081161     | 0.499     | 1.413       | 2.973  | 2.474 | 0.000  | 0.007     | Unknown                                 |
| ILMN_1236758 | WFDC2         | NM_026323        | -0.461    | 0.727       | 2.270  | 2.730 | 0.000  | 0.014     | Innate immune response                  |
| ILMN_2771237 | LBP           | NM_008489        | -0.348    | 0.786       | 2.186  | 2.535 | 0.000  | 0.099     | Innate immune response                  |
| ILMN_2639849 | CBLN4         | NM_175631        | -0.327    | 0.797       | 2.477  | 2.804 | 0.000  | 0.145     |                                         |
| ILMN_1241001 | EIF2S3Y       | NM_012011        | -0.309    | 0.807       | 2.684  | 2.993 | 0.001  | 0.189     |                                         |
| ILMN_1226356 | AI427515      | NM_173016        | -0.294    | 0.816       | 2.931  | 3.225 | 0.001  | 0.253     |                                         |
| ILMN_2508745 | ZFYVE21       | NM_026752        | -0.288    | 0.819       | 2.719  | 3.007 | 0.001  | 0.253     |                                         |
| ILMN_1258692 | A730098D12RIK | NM_177680        | 0.287     | 1.220       | 2.892  | 2.606 | 0.001  | 0.253     |                                         |
| ILMN_2766244 | MDH2          | NM_008617        | -0.280    | 0.823       | 3.140  | 3.420 | 0.001  | 0.290     |                                         |
| ILMN_2617005 | PRLR          | NM_011169        | -0.267    | 0.831       | 2.303  | 2.570 | 0.001  | 0.365     |                                         |
| ILMN_2691752 | OTX2          | NM_144841        | -0.260    | 0.835       | 2.171  | 2.431 | 0.002  | 0.401     |                                         |
| ILMN_2599997 | NCOR1         | NM_011308        | 0.254     | 1.193       | 3.062  | 2.808 | 0.002  | 0.436     |                                         |
| ILMN_2775885 | CALM2         | NM_007589        | -0.248    | 0.842       | 3.351  | 3.599 | 0.002  | 0.460     |                                         |
| ILMN_2633229 | ATP5A1        | NM_007505        | -0.249    | 0.841       | 3.182  | 3.431 | 0.002  | 0.460     |                                         |
| ILMN_1252953 | CBLN1         | NM_019626        | -0.243    | 0.845       | 2.606  | 2.849 | 0.003  | 0.472     |                                         |
| ILMN_2461018 | LDLR          | NM_010700        | 0.242     | 1.182       | 3.005  | 2.763 | 0.003  | 0.472     |                                         |
| ILMN_1253544 | 2900060B14RIK | NR_027901        | 0.242     | 1.183       | 2.978  | 2.736 | 0.003  | 0.472     |                                         |
| ILMN_2457835 | SIN3B         | NM_009188        | 0.236     | 1.178       | 3.457  | 3.221 | 0.003  | 0.538     |                                         |
| ILMN_2706269 | HSPB1         | NM_013560        | 0.232     | 1.174       | 2.582  | 2.350 | 0.004  | 0.561     |                                         |
| ILMN_2707541 | FOLR1         | NM_008034        | -0.228    | 0.854       | 2.245  | 2.472 | 0.004  | 0.566     |                                         |
| ILMN_2607196 | 0910001A06RIK | NM_144846        | -0.226    | 0.855       | 3.075  | 3.301 | 0.004  | 0.566     |                                         |
| ILMN_1242377 | PTDSR         | NM_033398        | 0.227     | 1.170       | 3.275  | 3.048 | 0.004  | 0.566     |                                         |
| ILMN_2582084 | PLEKHC1       | NM_146054        | 0.225     | 1.169       | 3.542  | 3.317 | 0.004  | 0.566     |                                         |
| ILMN_1247504 | SNAP91        | NM_013669        | -0.225    | 0.855       | 2.626  | 2.851 | 0.004  | 0.566     |                                         |
| ILMN_3162081 | WDR6          | NM_031392        | -0.221    | 0.858       | 2.814  | 3.035 | 0.005  | 0.607     |                                         |
| ILMN_2640927 | SLC23A2       | NM_018824        | -0.218    | 0.860       | 2.821  | 3.039 | 0.005  | 0.640     |                                         |
| ILMN_1255479 | CLDN2         | NM_016675        | -0.215    | 0.862       | 2.192  | 2.407 | 0.006  | 0.649     |                                         |
| ILMN_2638055 | FASN          | NM_007988        | -0.215    | 0.861       | 3.484  | 3.699 | 0.006  | 0.649     |                                         |
| ILMN_2588055 | ACTB          | NM_007393        | 0.214     | 1.160       | 2.741  | 2.527 | 0.006  | 0.649     |                                         |
| ILMN_2619848 | TFRC          | NM_011638        | -0.213    | 0.863       | 2.910  | 3.123 | 0.006  | 0.667     |                                         |
| ILMN_1236788 | IGFBP2        | NM_008342        | -0.210    | 0.864       | 2.341  | 2.551 | 0.006  | 0.688     |                                         |
| ILMN_1253148 | KL            | NM_013823        | -0.210    | 0.865       | 2.405  | 2.614 | 0.007  | 0.696     |                                         |
| ILMN_2595612 | IDH2          | NM_173011        | -0.206    | 0.867       | 2.886  | 3.092 | 0.007  | 0.743     |                                         |
| ILMN_2717514 | RBP1          | NM_011254        | -0.203    | 0.869       | 2.528  | 2.731 | 0.008  | 0.796     |                                         |
| ILMN_2671473 | C1QL2         | NM_207233        | 0.203     | 1.151       | 3.310  | 3.108 | 0.008  | 0.796     |                                         |
| ILMN_1222167 | GRIA2         | NM_001039195     | 0.198     | 1.147       | 3.721  | 3.523 | 0.009  | 0.882     |                                         |
| ILMN_2623216 | PGRMC1        | NM_016783        | -0.197    | 0.873       | 2.959  | 3.155 | 0.010  | 0.884     |                                         |
| ILMN_2491186 | ZIC1          | NM_009573        | -0.195    | 0.874       | 2.464  | 2.659 | 0.010  | 0.884     |                                         |

|              |               |              |        |       |       |       |       |       |
|--------------|---------------|--------------|--------|-------|-------|-------|-------|-------|
| ILMN_1256408 | TSHZ2         | NM_080455    | 0.195  | 1.145 | 2.650 | 2.454 | 0.010 | 0.884 |
| ILMN_2629112 | ASAH3L        | NM_139306    | -0.194 | 0.874 | 2.390 | 2.584 | 0.010 | 0.884 |
| ILMN_1212907 | D430039N05RIK | NM_175514    | -0.193 | 0.875 | 3.246 | 3.439 | 0.010 | 0.894 |
| ILMN_1245795 | AHCYL1        | NM_145542    | -0.191 | 0.876 | 2.947 | 3.139 | 0.011 | 0.951 |
| ILMN_2450884 | SPCS3         | NM_029701    | 0.191  | 1.141 | 3.335 | 3.144 | 0.012 | 0.954 |
| ILMN_2494251 | TUBA1         | NM_011653    | -0.189 | 0.877 | 3.418 | 3.607 | 0.012 | 0.962 |
| ILMN_2687797 | CRYAB         | NM_009964    | 0.188  | 1.139 | 3.385 | 3.197 | 0.012 | 0.963 |
| ILMN_1233146 | RASGRF1       | NM_011245    | -0.184 | 0.881 | 4.243 | 4.426 | 0.014 | 0.998 |
| ILMN_2481362 | UST           | NM_177387    | 0.183  | 1.135 | 3.530 | 3.348 | 0.014 | 0.998 |
| ILMN_2602257 | TMEM68        | NM_028097    | -0.180 | 0.883 | 2.995 | 3.175 | 0.015 | 0.998 |
| ILMN_2617496 | DEK           | NM_025900    | -0.180 | 0.882 | 2.438 | 2.619 | 0.016 | 0.998 |
| ILMN_2729364 | GLRA2         | NM_183427    | -0.180 | 0.883 | 2.534 | 2.714 | 0.016 | 0.998 |
| ILMN_1243751 | 3110004L20RIK | NM_001033167 | 0.179  | 1.132 | 3.473 | 3.295 | 0.016 | 0.998 |
| ILMN_1249049 | MRPL19        | NM_026490    | -0.179 | 0.883 | 2.731 | 2.910 | 0.016 | 0.998 |
| ILMN_1250562 | SC4MOL        | NM_025436    | -0.178 | 0.884 | 2.876 | 3.054 | 0.016 | 0.998 |
| ILMN_2456435 | DGKG          | NM_138650    | 0.178  | 1.131 | 3.991 | 3.813 | 0.017 | 0.998 |
| ILMN_1229368 | 6720463L11RIK | NR_036615    | 0.175  | 1.129 | 3.009 | 2.834 | 0.018 | 0.998 |
| ILMN_2750428 | TIMM44        | NM_011592    | -0.175 | 0.886 | 2.698 | 2.873 | 0.018 | 0.998 |
| ILMN_2776922 | GLRX1         | NM_053108    | -0.174 | 0.886 | 2.703 | 2.877 | 0.018 | 0.998 |
| ILMN_1218051 | IQGAP2        | NM_027711    | 0.173  | 1.127 | 3.275 | 3.102 | 0.020 | 0.998 |
| ILMN_2510694 | NME7          | NM_138314    | 0.172  | 1.126 | 4.661 | 4.490 | 0.020 | 0.998 |
| ILMN_1225386 | 2300009A05RIK | NM_027090    | -0.172 | 0.888 | 3.165 | 3.336 | 0.020 | 0.998 |
| ILMN_1259946 | CDC42SE1      | NM_172395    | -0.172 | 0.888 | 3.182 | 3.354 | 0.020 | 0.998 |
| ILMN_2462901 | C230098I05RIK | NM_001101488 | -0.172 | 0.888 | 2.628 | 2.800 | 0.020 | 0.998 |
| ILMN_2702508 | EBNA1BP2      | NM_026932    | -0.170 | 0.889 | 2.680 | 2.850 | 0.021 | 0.998 |
| ILMN_2677056 | 1500003O03RIK | NM_019769    | -0.171 | 0.888 | 3.561 | 3.732 | 0.021 | 0.998 |
| ILMN_2520582 | PLXNA4        | NM_175750    | 0.170  | 1.125 | 2.817 | 2.647 | 0.021 | 0.998 |
| ILMN_3160817 | CTSD          | NM_009983    | -0.169 | 0.889 | 2.789 | 2.958 | 0.021 | 0.998 |
| ILMN_2772582 | SMAD3         | NM_016769    | 0.170  | 1.125 | 3.240 | 3.070 | 0.021 | 0.998 |
| ILMN_1220912 | SLC4A7        | NM_001033270 | 0.169  | 1.124 | 3.042 | 2.873 | 0.022 | 0.998 |
| ILMN_1215624 | GPR88         | NM_022427    | -0.169 | 0.889 | 2.336 | 2.506 | 0.022 | 0.998 |
| ILMN_2493030 | 2310043N10RIK | NR_003513    | -0.168 | 0.890 | 2.847 | 3.015 | 0.023 | 0.998 |
| ILMN_2684875 | FXC1          | NM_019502    | -0.168 | 0.890 | 2.457 | 2.625 | 0.023 | 0.998 |
| ILMN_1223387 | 2810046M22RIK | NM_001081441 | -0.167 | 0.891 | 2.293 | 2.460 | 0.023 | 0.998 |
| ILMN_1231651 | LANCL2        | NM_133737    | -0.167 | 0.891 | 2.463 | 2.630 | 0.023 | 0.998 |
| ILMN_1250569 | RAPGEFL1      | NM_001080925 | 0.167  | 1.123 | 3.902 | 3.735 | 0.023 | 0.998 |
| ILMN_2658067 | 1700001L19RIK | NM_027035    | -0.166 | 0.891 | 2.525 | 2.691 | 0.024 | 0.998 |
| ILMN_1235411 | B230219D22RIK | NM_181278    | -0.166 | 0.891 | 2.882 | 3.048 | 0.024 | 0.998 |
| ILMN_1220739 | NSG2          | NM_008741    | -0.166 | 0.891 | 3.594 | 3.760 | 0.024 | 0.998 |
| ILMN_1235361 | LOC244911     | NM_001081314 | 0.166  | 1.122 | 2.788 | 2.622 | 0.024 | 0.998 |
| ILMN_2723631 | HINT1         | NM_008248    | 0.166  | 1.122 | 3.850 | 3.684 | 0.024 | 0.998 |
| ILMN_2777087 | MIA1          | NM_019394    | -0.165 | 0.892 | 2.482 | 2.647 | 0.025 | 0.998 |
| ILMN_1234257 | GTF3C2        | NM_027901    | 0.165  | 1.121 | 3.121 | 2.956 | 0.025 | 0.998 |
| ILMN_1241171 | ANXA3         | NM_013470    | 0.164  | 1.121 | 2.698 | 2.534 | 0.025 | 0.998 |
| ILMN_1227012 | NDUFB4        | NM_026610    | -0.163 | 0.893 | 2.784 | 2.947 | 0.026 | 0.998 |
| ILMN_1234072 | PDLIM1        | NM_016861    | 0.163  | 1.120 | 2.679 | 2.515 | 0.026 | 0.998 |

|              |               |              |        |       |       |       |       |       |
|--------------|---------------|--------------|--------|-------|-------|-------|-------|-------|
| ILMN_1245918 | MAP3K7IP1     | NM_025609    | 0.163  | 1.119 | 3.222 | 3.060 | 0.026 | 0.998 |
| ILMN_1219169 | GFER          | NM_023040    | 0.163  | 1.119 | 3.165 | 3.002 | 0.026 | 0.998 |
| ILMN_1239557 | UGT8A         | NM_011674    | 0.162  | 1.119 | 3.031 | 2.869 | 0.026 | 0.998 |
| ILMN_2709891 | CLDN1         | NM_016674    | -0.162 | 0.894 | 2.384 | 2.546 | 0.027 | 0.998 |
| ILMN_2777706 | MRPS12        | NM_011885    | 0.162  | 1.119 | 3.431 | 3.269 | 0.027 | 0.998 |
| ILMN_1230586 | TRAF1         | NM_009421    | 0.162  | 1.119 | 2.381 | 2.219 | 0.027 | 0.998 |
| ILMN_1240075 | PDCD7         | NM_016688    | 0.161  | 1.118 | 2.684 | 2.522 | 0.027 | 0.998 |
| ILMN_2512429 | ZFP312        | NM_080433    | 0.160  | 1.118 | 3.588 | 3.428 | 0.028 | 0.998 |
| ILMN_1253131 | NAP1L1        | NM_001146707 | -0.160 | 0.895 | 2.818 | 2.977 | 0.029 | 0.998 |
| ILMN_2760977 | IMPACT        | NM_008378    | -0.159 | 0.895 | 3.331 | 3.490 | 0.029 | 0.998 |
| ILMN_2651886 | LOC668435     | NM_008828    | -0.159 | 0.896 | 3.589 | 3.748 | 0.029 | 0.998 |
| ILMN_1221494 | UBTD2         | NM_173784    | -0.159 | 0.896 | 2.514 | 2.673 | 0.029 | 0.998 |
| ILMN_1249637 | PEG13         | NR_002864    | 0.160  | 1.117 | 3.110 | 2.950 | 0.029 | 0.998 |
| ILMN_2666999 | 2610528K11RIK | NM_175184    | -0.159 | 0.896 | 2.802 | 2.960 | 0.029 | 0.998 |
| ILMN_2714936 | MKI67IP       | NM_026472    | -0.159 | 0.896 | 2.704 | 2.863 | 0.030 | 0.998 |
| ILMN_1237216 | LOC627375     | NM_016957    | -0.159 | 0.896 | 3.166 | 3.325 | 0.030 | 0.998 |
| ILMN_1377918 | UBC           | NM_019639    | 0.159  | 1.116 | 3.960 | 3.801 | 0.030 | 0.998 |
| ILMN_2691478 | CCKBR         | NM_007627    | -0.158 | 0.896 | 2.726 | 2.884 | 0.030 | 0.998 |
| ILMN_2761594 | CIRBP         | NM_007705    | -0.158 | 0.896 | 2.561 | 2.719 | 0.030 | 0.998 |
| ILMN_2445324 | ZFPM1         | NM_009569    | 0.157  | 1.115 | 3.476 | 3.319 | 0.031 | 0.998 |
| ILMN_2668927 | APOD          | NM_007470    | 0.157  | 1.115 | 2.829 | 2.672 | 0.031 | 0.998 |
| ILMN_2476140 | TUBA1C        | NM_009448    | -0.157 | 0.897 | 2.479 | 2.636 | 0.031 | 0.998 |
| ILMN_2518132 | 9630033F20RIK | NM_177003    | 0.157  | 1.115 | 3.180 | 3.023 | 0.031 | 0.998 |
| ILMN_1243212 | SPARC         | NM_009242    | -0.157 | 0.897 | 2.792 | 2.949 | 0.031 | 0.998 |
| ILMN_1254358 | IGFBP5        | NM_010518    | -0.157 | 0.897 | 3.256 | 3.413 | 0.031 | 0.998 |
| ILMN_2765513 | KIF3A         | NM_008443    | 0.156  | 1.114 | 3.469 | 3.313 | 0.032 | 0.998 |
| ILMN_1229769 | SYNE1         | NM_153399    | 0.156  | 1.114 | 3.463 | 3.307 | 0.033 | 0.998 |
| ILMN_2698949 | IPO11         | NM_029665    | -0.155 | 0.898 | 3.085 | 3.240 | 0.033 | 0.998 |
| ILMN_2774701 | UBE2Z         | NM_172300    | -0.156 | 0.898 | 2.431 | 2.587 | 0.033 | 0.998 |
| ILMN_2763731 | CDC42BPB      | NM_183016    | -0.155 | 0.898 | 3.021 | 3.176 | 0.033 | 0.998 |
| ILMN_2498357 | PRKCBP1       | NM_027230    | 0.154  | 1.113 | 3.784 | 3.630 | 0.033 | 0.998 |
| ILMN_2727520 | COX8B         | NM_007751    | -0.154 | 0.898 | 2.303 | 2.457 | 0.033 | 0.998 |
| ILMN_1237507 | DLST          | NM_030225    | -0.154 | 0.899 | 3.141 | 3.295 | 0.034 | 0.998 |
| ILMN_2629747 | DHX9          | NM_007842    | -0.154 | 0.899 | 2.622 | 2.776 | 0.034 | 0.998 |
| ILMN_2678714 | ID4           | NM_031166    | -0.154 | 0.899 | 2.517 | 2.670 | 0.034 | 0.998 |
| ILMN_2426833 | WDR60         | NM_146039    | -0.154 | 0.899 | 2.335 | 2.489 | 0.035 | 0.998 |
| ILMN_1237640 | CNIH          | NM_009919    | -0.154 | 0.899 | 2.721 | 2.874 | 0.035 | 0.998 |
| ILMN_1224664 | FBXL11        | NM_001001984 | 0.154  | 1.113 | 3.067 | 2.913 | 0.035 | 0.998 |
| ILMN_1241910 | PSMD6         | NM_025550    | -0.153 | 0.899 | 2.360 | 2.513 | 0.035 | 0.998 |
| ILMN_2747897 | NDUFS3        | NM_026688    | -0.153 | 0.899 | 3.416 | 3.568 | 0.036 | 0.998 |
| ILMN_2703657 | DLD           | NM_007861    | -0.153 | 0.900 | 2.538 | 2.690 | 0.036 | 0.998 |
| ILMN_1216847 | GPD1          | NM_010271    | 0.153  | 1.112 | 3.795 | 3.642 | 0.036 | 0.998 |
| ILMN_2596761 | LOC636633     | NM_025364    | -0.153 | 0.900 | 2.580 | 2.732 | 0.036 | 0.998 |
| ILMN_2516699 | UBB           | NM_011664    | 0.152  | 1.111 | 4.800 | 4.648 | 0.036 | 0.998 |
| ILMN_2712900 | SARS          | NM_011319    | -0.152 | 0.900 | 2.617 | 2.769 | 0.036 | 0.998 |
| ILMN_1244923 | APBA2         | NM_007461    | 0.152  | 1.111 | 3.111 | 2.959 | 0.036 | 0.998 |

|              |               |              |        |       |       |       |       |       |
|--------------|---------------|--------------|--------|-------|-------|-------|-------|-------|
| ILMN_1246824 | 2610304F08RIK | NM_181819    | -0.152 | 0.900 | 2.252 | 2.404 | 0.037 | 0.998 |
| ILMN_2591632 | GTF2E1        | NM_028812    | -0.152 | 0.900 | 2.811 | 2.963 | 0.037 | 0.998 |
| ILMN_2760840 | PPP1R8        | NM_146154    | -0.151 | 0.901 | 2.614 | 2.765 | 0.037 | 0.998 |
| ILMN_2650289 | RIN1          | NM_145495    | 0.151  | 1.110 | 3.287 | 3.136 | 0.038 | 0.998 |
| ILMN_1255493 | 1810063B07RIK | NM_026209    | 0.151  | 1.110 | 3.000 | 2.850 | 0.038 | 0.998 |
| ILMN_1257281 | SCFD1         | NM_029825    | -0.151 | 0.901 | 2.585 | 2.735 | 0.038 | 0.998 |
| ILMN_1241976 | UBADC1        | NM_133835    | -0.150 | 0.901 | 2.554 | 2.704 | 0.039 | 0.998 |
| ILMN_1218347 | MYLK          | NM_139300    | 0.150  | 1.109 | 2.977 | 2.827 | 0.040 | 0.998 |
| ILMN_2490479 | YWHAB         | NM_018753    | -0.149 | 0.902 | 3.830 | 3.978 | 0.040 | 0.998 |
| ILMN_2744560 | RAB33B        | NM_016858    | -0.149 | 0.902 | 2.855 | 3.005 | 0.040 | 0.998 |
| ILMN_1217768 | 2600003E23RIK | NM_027373    | 0.148  | 1.108 | 3.019 | 2.871 | 0.041 | 0.998 |
| ILMN_1248438 | FLYWCH1       | NM_153791    | 0.148  | 1.108 | 3.183 | 3.035 | 0.041 | 0.998 |
| ILMN_1215740 | ZFP46         | NM_009557    | -0.148 | 0.903 | 3.156 | 3.304 | 0.041 | 0.998 |
| ILMN_1237075 | ETFA          | NM_145615    | -0.147 | 0.903 | 2.949 | 3.097 | 0.041 | 0.998 |
| ILMN_1231868 | 2600005N12RIK | NM_197995    | -0.148 | 0.902 | 2.756 | 2.904 | 0.042 | 0.998 |
| ILMN_1256563 | GLT25D1       | NM_146211    | -0.147 | 0.903 | 2.844 | 2.991 | 0.042 | 0.998 |
| ILMN_2729447 | 9030612M13RIK | NM_172458    | 0.148  | 1.108 | 2.881 | 2.733 | 0.042 | 0.998 |
| ILMN_1239180 | BC021395      | NM_144861    | 0.147  | 1.107 | 3.341 | 3.193 | 0.042 | 0.998 |
| ILMN_1243095 | VBP1          | NM_011692    | -0.147 | 0.903 | 2.753 | 2.900 | 0.042 | 0.998 |
| ILMN_2740392 | ANAPC4        | NM_024213    | -0.147 | 0.903 | 2.978 | 3.124 | 0.043 | 0.998 |
| ILMN_2716756 | DCN           | NM_001190451 | -0.147 | 0.903 | 2.480 | 2.627 | 0.043 | 0.998 |
| ILMN_2444886 | RLF           | NM_001081013 | 0.146  | 1.107 | 3.116 | 2.970 | 0.043 | 0.998 |
| ILMN_2740222 | ZFP644        | NM_026856    | 0.146  | 1.107 | 3.051 | 2.905 | 0.043 | 0.998 |
| ILMN_1254437 | SLC31A1       | NM_175090    | -0.146 | 0.903 | 2.694 | 2.840 | 0.043 | 0.998 |
| ILMN_2523848 | TAOK1         | NM_144825    | 0.147  | 1.107 | 2.679 | 2.532 | 0.043 | 0.998 |
| ILMN_1229029 | DLX1          | NM_010053    | -0.146 | 0.904 | 2.614 | 2.760 | 0.043 | 0.998 |
| ILMN_2740000 | B2M           | NM_009735    | -0.146 | 0.904 | 2.900 | 3.046 | 0.043 | 0.998 |
| ILMN_1215713 | EGR4          | NM_020596    | -0.146 | 0.904 | 2.926 | 3.072 | 0.044 | 0.998 |
| ILMN_2714031 | ERRFI1        | NM_133753    | -0.146 | 0.904 | 3.034 | 3.180 | 0.044 | 0.998 |
| ILMN_1257919 | SEPT3         | NM_011889    | 0.146  | 1.107 | 2.459 | 2.312 | 0.044 | 0.998 |
| ILMN_1260196 | PRKAR2A       | NM_008924    | -0.146 | 0.904 | 2.467 | 2.612 | 0.044 | 0.998 |
| ILMN_1217191 | FMN2          | NM_019445    | -0.145 | 0.904 | 2.663 | 2.808 | 0.045 | 0.998 |
| ILMN_2686327 | GAS6          | NM_019521    | -0.145 | 0.904 | 2.977 | 3.122 | 0.045 | 0.998 |
| ILMN_2657478 | CD53          | NM_007651    | -0.145 | 0.905 | 2.346 | 2.490 | 0.045 | 0.998 |
| ILMN_2751228 | NUDCD2        | NM_026023    | -0.144 | 0.905 | 2.384 | 2.528 | 0.045 | 0.998 |
| ILMN_2644229 | KCND2         | NM_019697    | -0.144 | 0.905 | 3.290 | 3.434 | 0.046 | 0.998 |
| ILMN_2675097 | SPIN1         | NM_011462    | -0.145 | 0.904 | 3.087 | 3.232 | 0.046 | 0.998 |
| ILMN_2745251 | CLK4          | NM_007714    | -0.144 | 0.905 | 2.668 | 2.812 | 0.046 | 0.998 |
| ILMN_1245504 | HMGB1         | NM_010439    | -0.144 | 0.905 | 2.797 | 2.942 | 0.047 | 0.998 |
| ILMN_2743633 | CABP1         | NM_013879    | 0.143  | 1.105 | 2.794 | 2.650 | 0.047 | 0.998 |
| ILMN_2751075 | GNA11         | NM_010301    | -0.143 | 0.905 | 3.063 | 3.207 | 0.047 | 0.998 |
| ILMN_1239042 | ANKHD1        | NM_175375    | 0.143  | 1.104 | 2.511 | 2.368 | 0.048 | 0.998 |
| ILMN_1244045 | KLF3          | NM_008453    | 0.143  | 1.104 | 3.133 | 2.990 | 0.048 | 0.998 |
| ILMN_2712867 | TIMP2         | NM_011594    | -0.142 | 0.906 | 3.546 | 3.688 | 0.049 | 0.998 |
| ILMN_1246139 | CLDN11        | NM_008770    | 0.142  | 1.104 | 4.185 | 4.043 | 0.049 | 0.998 |
| ILMN_2745741 | MARCH6        | NM_172606    | -0.142 | 0.906 | 2.608 | 2.751 | 0.049 | 0.998 |

|              |               |              |        |       |       |       |       |       |
|--------------|---------------|--------------|--------|-------|-------|-------|-------|-------|
| ILMN_2523316 | UNC5B         | NM_029770    | 0.142  | 1.103 | 2.812 | 2.670 | 0.049 | 0.998 |
| ILMN_2639674 | PCSK2         | NM_008792    | -0.142 | 0.906 | 3.408 | 3.550 | 0.049 | 0.998 |
| ILMN_2672597 | GNG10         | NM_025277    | -0.142 | 0.906 | 2.994 | 3.136 | 0.049 | 0.998 |
| ILMN_1234112 | TOMM70A       | NM_138599    | -0.142 | 0.906 | 2.795 | 2.937 | 0.049 | 0.998 |
| ILMN_2724415 | 1810037C20RIK | NM_025473    | -0.142 | 0.906 | 2.643 | 2.785 | 0.050 | 0.998 |
| ILMN_3162388 | BBS5          | NM_028284    | -0.141 | 0.907 | 2.690 | 2.831 | 0.050 | 0.998 |
| ILMN_1218169 | MLL1          | NM_001081049 | 0.141  | 1.103 | 3.479 | 3.337 | 0.050 | 0.998 |
| ILMN_1237846 | BRP44         | NM_027430    | -0.142 | 0.906 | 2.955 | 3.097 | 0.050 | 0.998 |
